# Supplementary material for: Critical nucleus of Greek-key-like core of α-synuclein protofibril and its disruption by dopamine and norepinephrine
Source: Royal Society of Chemistry journal article supplement (doi:10.1039/c9cp04610k), 2019-11-18
Supplement: c9cp04610k1.pdf [file c9cp04610k1.pdf]

## Critical nucleus of Greek-key-like core of $\alpha$ -synuclein protofibril and its disruption by dopamine and norepinephrine

Yu Zou,<sup>ab</sup> Zhenyu Qian,<sup>c</sup> Yehong Gong,<sup>b</sup> Yiming Tang,<sup>d</sup> Guanghong  
Wei,<sup>\*d</sup> and Qingwen Zhang<sup>\*b</sup>

<sup>a</sup> Department of Sport and Exercise Science, College of Education, Zhejiang University, 148 Tianmushan Road, Hangzhou 310007, Zhejiang, People's Republic of China

<sup>b</sup> College of Physical Education and Training, Shanghai University of Sport, 399 Changhai Road, Shanghai 200438, People's Republic of China. E-mail: zqw@sus.edu.cn

<sup>c</sup> Key Laboratory of Exercise and Health Sciences (Ministry of Education) and School of Kinesiology, Shanghai University of Sport, 399 Changhai Road, Shanghai 200438, People's Republic of China

<sup>d</sup> State Key Laboratory of Surface Physics, Key Laboratory for Computational Physical Science (Ministry of Education), and Department of Physics, Fudan University, 220 Handan Road, Shanghai 200433, People's Republic of China. E-mail: ghwei@fudan.edu.cn

**This material contains three supplemental figures.**

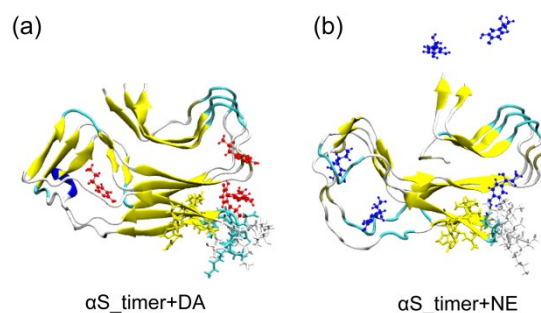

Fig. S1 Snapshots in the  $\alpha$ S\_trimer+DA and  $\alpha$ S\_trimer+NE systems, showing that the

smaller size of DA enables more DA molecules to bind to residues 45~52 which are located at the entry of the Greek-key-like core.

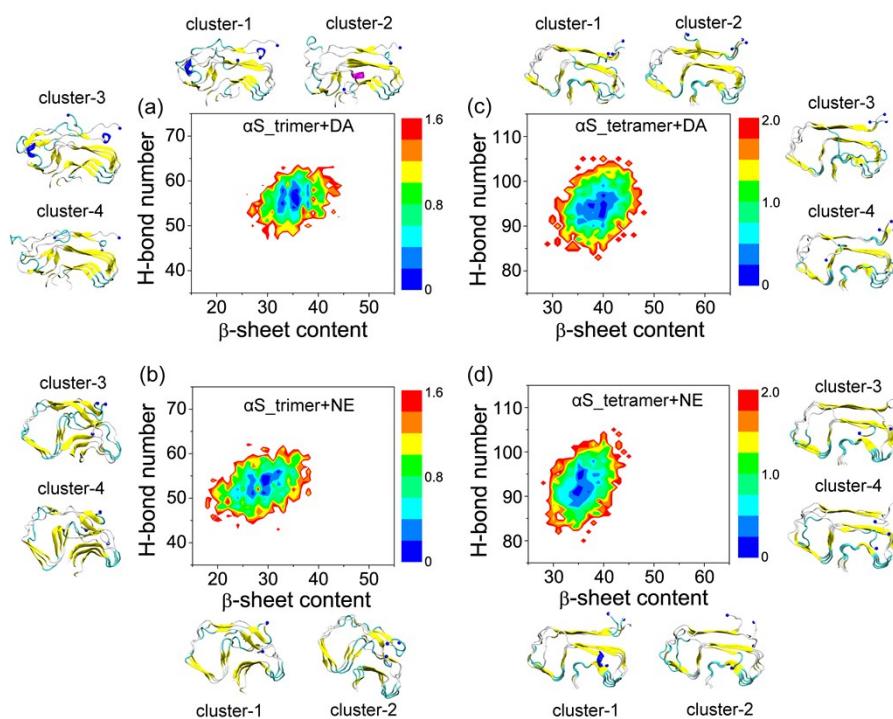

Fig. S2 Potential of mean force (PMF) for  $\alpha$ S trimer (a, b) and tetramer (c, d) in the presence of DA/NE molecules. The PMF (in kcal mol<sup>-1</sup>) of  $\alpha$ S oligomers plotted as a function of  $\beta$ -sheet content and the number of H-bonds of  $\alpha$ S oligomers. The conformations in the side and bottom of the PMF show the first four most-populated clusters of different systems.

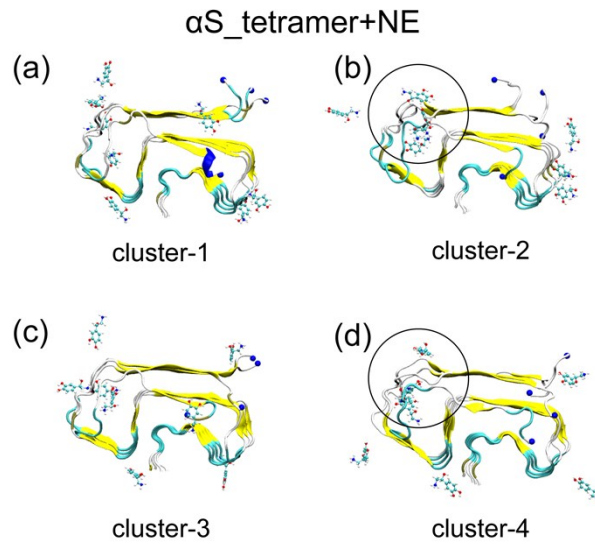

Fig. S3 Representative conformations of the first four most-populated clusters of  $\alpha$ S\_tetramer+NE system. The  $C\alpha$  atom in the N-terminal of each  $\alpha$ S chain is represented by the blue bead.
